# Supplementary material for: Tunable photophysical properties of phenyleneethynylene based bipyridine ligands
Source: Royal Society of Chemistry journal article supplement (doi:10.1039/b9pp00002j), 2009-07-31
Supplement: b9pp00002j.pdf [file b9pp00002j.pdf]

## Tunable photophysical properties of phenyleneethynylene based bipyridine ligands

P. V. James,<sup>a</sup> K. Yoosaf,<sup>a</sup> Jatish Kumar,<sup>a</sup> K. George Thomas,<sup>\*a</sup> Andrea Listorti,<sup>b</sup>  
Gianluca Accorsi<sup>b</sup> and Nicola Armaroli<sup>\*b</sup>

### SUPPORTING INFORMATION

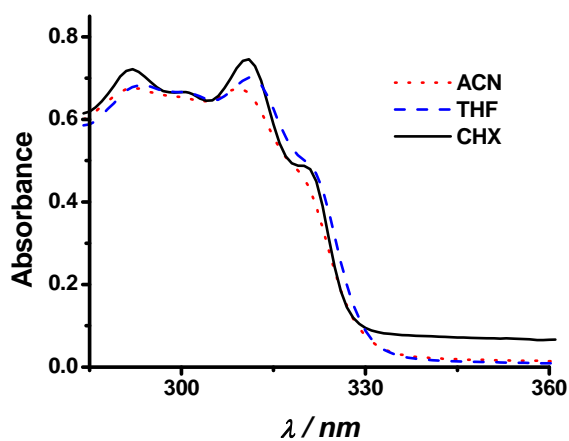

Fig. S1. Absorption spectra of molecule 2 in solvents of different polarity

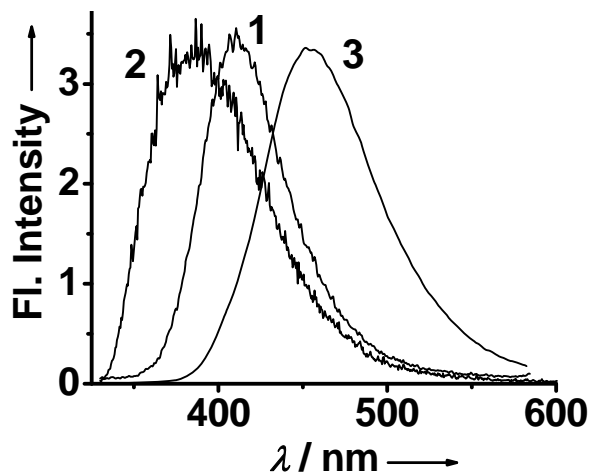

Fig. S2. Emission spectra of ligands 1-3 recorded in acetonitrile at 77 K

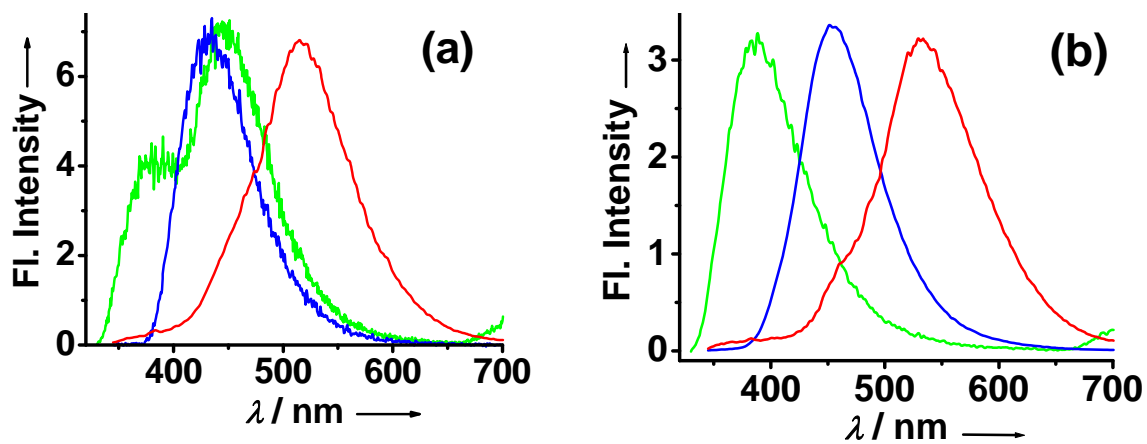

**Fig. S3.** Normalized fluorescence spectra of (a) **1:** $\text{H}^+$  (blue), **2:** $\text{H}^+$  (green), **3:** $\text{H}^+$  (red) and (b) **1:**  $\text{Zn}^{2+}$  (blue), **2:**  $\text{Zn}^{2+}$  (green), **3:**  $\text{Zn}^{2+}$  (red) at 77 K in acetonitrile.
